# Supplementary material for: Cross-Platform Identification and Validation of Uveal Melanoma Vitreous Protein Biomarkers
Source: PubMed Central journal article supplement — Invest Ophthalmol Vis Sci. 2023 Nov 13;64(14):14. doi: 10.1167/iovs.64.14.14 (PMC10653261; doi:10.1167/iovs.64.14.14), 2023-11-13
Supplement: iovs-64-14-14_s001.pdf [file iovs-64-14-14_s001.pdf]

**Table S1.** Mass spectrometry overview

| <b>Patient</b> | <b>Condition</b> | <b>Spectra</b> | <b>Peptide</b> | <b>Proteins</b> | <b>Spectrum-level FDR (%)</b> |
|----------------|------------------|----------------|----------------|-----------------|-------------------------------|
| 1              | UM               | 7,603          | 4,573          | 349             | 1.1                           |
| 2              | UM               | 4,863          | 2,997          | 255             | 0.5                           |
| 3              | UM               | 6,858          | 4,367          | 384             | 1.7                           |
| 4              | UM               | 5,877          | 3,656          | 300             | 0.9                           |
| 5              | UM               | 11,626         | 6,755          | 620             | 1.2                           |
| 6              | UM               | 3,599          | 2,389          | 275             | 0.7                           |
| 7              | UM               | 8,586          | 4,717          | 493             | 0.6                           |
| 8              | UM               | 6,500          | 4,292          | 438             | 0.7                           |
| 9              | ERM              | 2,557          | 1,915          | 287             | 0.7                           |
| 10             | ERM              | 5,697          | 3,293          | 336             | 0.7                           |
| 11             | ERM              | 1,061          | 857            | 173             | 0.5                           |
