# Supplementary material for: Cross-Platform Identification and Validation of Uveal Melanoma Vitreous Protein Biomarkers
Source: PubMed Central journal article supplement — Invest Ophthalmol Vis Sci. 2023 Nov 13;64(14):14. doi: 10.1167/iovs.64.14.14 (PMC10653261; doi:10.1167/iovs.64.14.14), 2023-11-13
Supplement: iovs-64-14-14_s005.pdf [file iovs-64-14-14_s005.pdf]

**Table S5.** IGF regulatory effectors represented in UM vitreous.

| <b>UniProt ID</b> | <b>Protein</b> | <b>log<sub>2</sub> (fold-change)</b> | <b>p-value (1-way ANOVA)</b> |
|-------------------|----------------|--------------------------------------|------------------------------|
| P24592            | IGFBP6         | 3.1371                               | 0.00275                      |
| P02647            | APOA1          | 2.9361                               | 0.00356                      |
| P02671            | FIBA           | 8.9233                               | 0.04716                      |
| P02652            | APOA2          | 10.462                               | 0.04807                      |
| P35858            | IGFALS         | 1.7176                               | 0.04225                      |
| P01009            | A1AT           | 2.0283                               | 0.00159                      |
| P05546            | HEP2           | 1.3979                               | 0.00099                      |
| P00747            | PLMN           | 1.6978                               | 0.03119                      |
| P00734            | THRB           | 1.8942                               | 0.02228                      |
| P01024            | C3             | 2.7570                               | 0.00467                      |
| P01042            | KNG1           | 1.8078                               | 0.01666                      |
